# Supplementary material for: Stream laws in tectonic landscape analogue models
Source: Copernicus journal article supplement (doi:10.5194/egusphere-2022-911), 2022-11-04

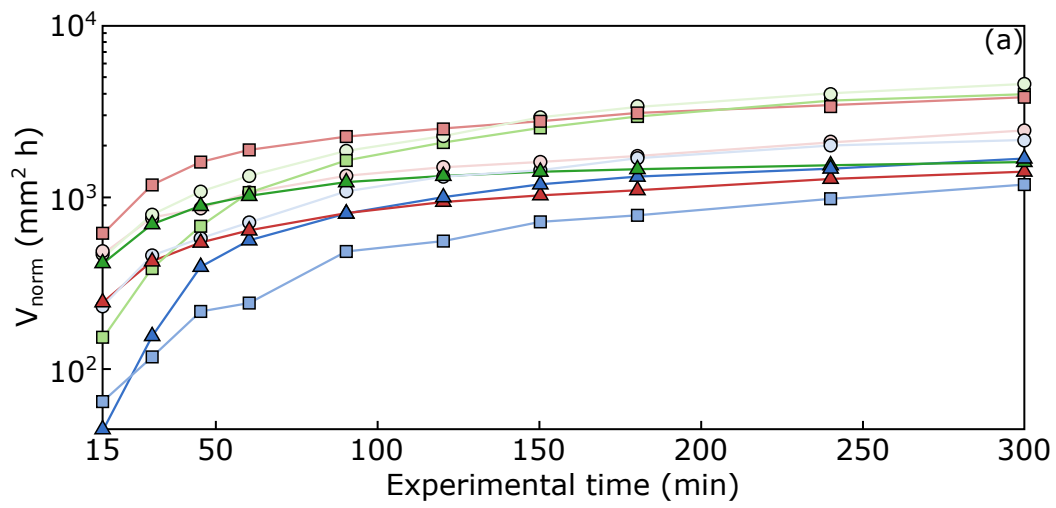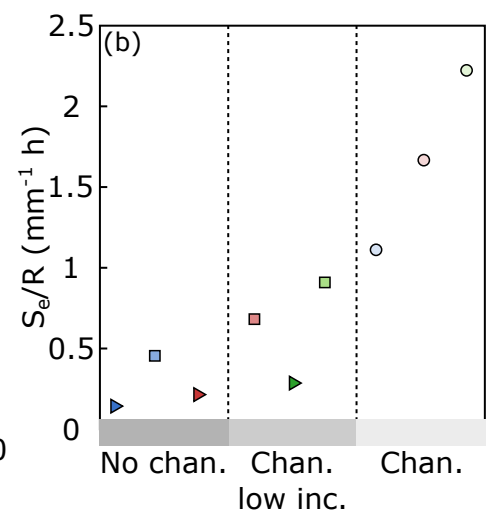

Supplement: Supplementary file [file egusphere-2022-911-AC2-supplement.pdf]
